# Supplementary material for: Gold nanoparticle interactions with endothelial cells cultured under physiological conditions
Source: Royal Society of Chemistry journal article supplement (doi:10.1039/c6bm00853d), 2017-01-01
Supplement: c6bm00853d1.pdf [file c6bm00853d1.pdf]

# Electronic Supplementary Information (ESI)

*for*

## Gold nanoparticle interactions with endothelial cells cultured under physiological conditions

C. Freese<sup>a\*</sup>, L. Anspach<sup>a</sup>, R. C. Deller<sup>b†</sup>, S.-J. Richards<sup>b</sup>, M. I. Gibson<sup>b</sup>, C. J. Kirkpatrick<sup>a</sup> and R. E. Unger<sup>a</sup>

<sup>a</sup> REPAIR-lab, Institute of Pathology, University Medical Center of the Johannes Gutenberg University Mainz and European Institute of Excellence on Tissue Engineering and Regenerative Medicine, Langenbeckstr. 1, 55131 Mainz, Germany

<sup>b</sup> University of Warwick, Department of Chemistry, Coventry, CV4 7AL, United Kingdom.

**A**

| Diluent                | H <sub>2</sub> O | PBS        | EBGM       | EBGM + Supplement | EBGM + 15% FCS |
|------------------------|------------------|------------|------------|-------------------|----------------|
| UV <sub>max</sub> (nm) | 519              | 520        | 524        | 522               | 521            |
| Diameter (nm)*         | 29 (± 0.7)       | 27 (± 0.1) | 30 (± 0.7) | 34 (± 1.1)        | 19 (± 0.6)     |

**B**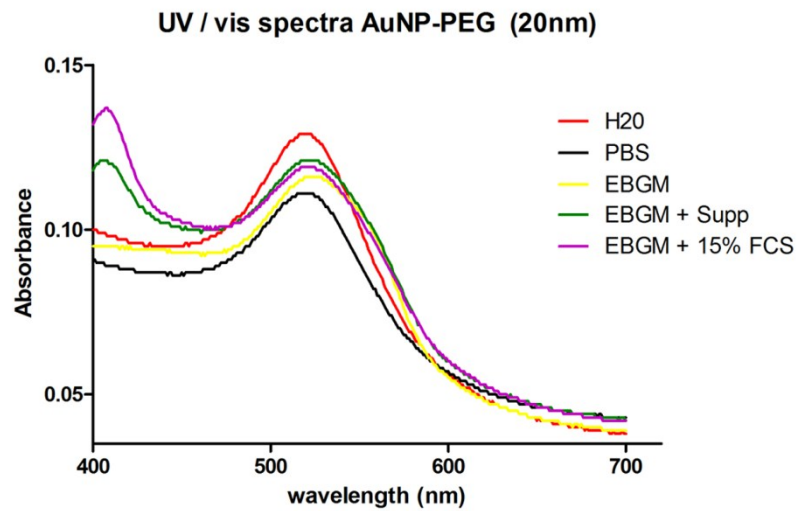

Supplemental figure 1. Characterization of PEGylated AuNPs.

PEGylated Gold nanoparticles (AuNPs) were characterized using dynamic light scattering (DLS; (A)) and ultra violet – visible spectroscopy (A + B). PEGylated AuNPs were diluted in different media (water, PBS, cell culture media (ECBM) without and with additives (supplement or 15 % serum).

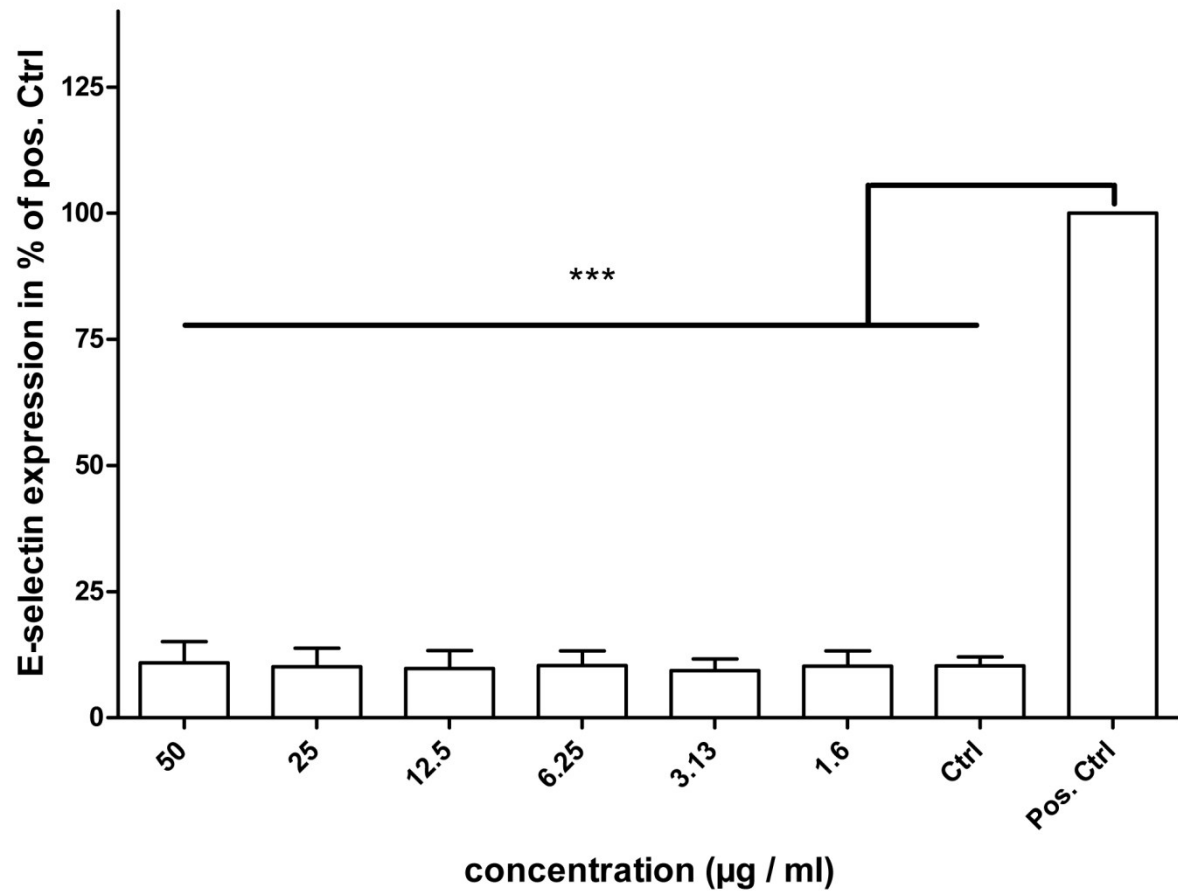

**Supplemental figure 2.** E-selectin expression in HUVEC after PEGylated AuNP exposure.

HUVEC were treated with different concentrations of PEGylated AuNPs and the expression of E-selectin was quantified by CAM-EIA. Control cells were treated with the same amount of diluent. Lipopolysaccharide (LPS; 1 µg / mL) was used as positive control and set to 100% E-selectin expression. Data is presented in mean ± SD for five independent experiments. \*\*\*:  $P < 0.001$  compared to the positive control (ONEway ANOVA with Dunnetts t-test).

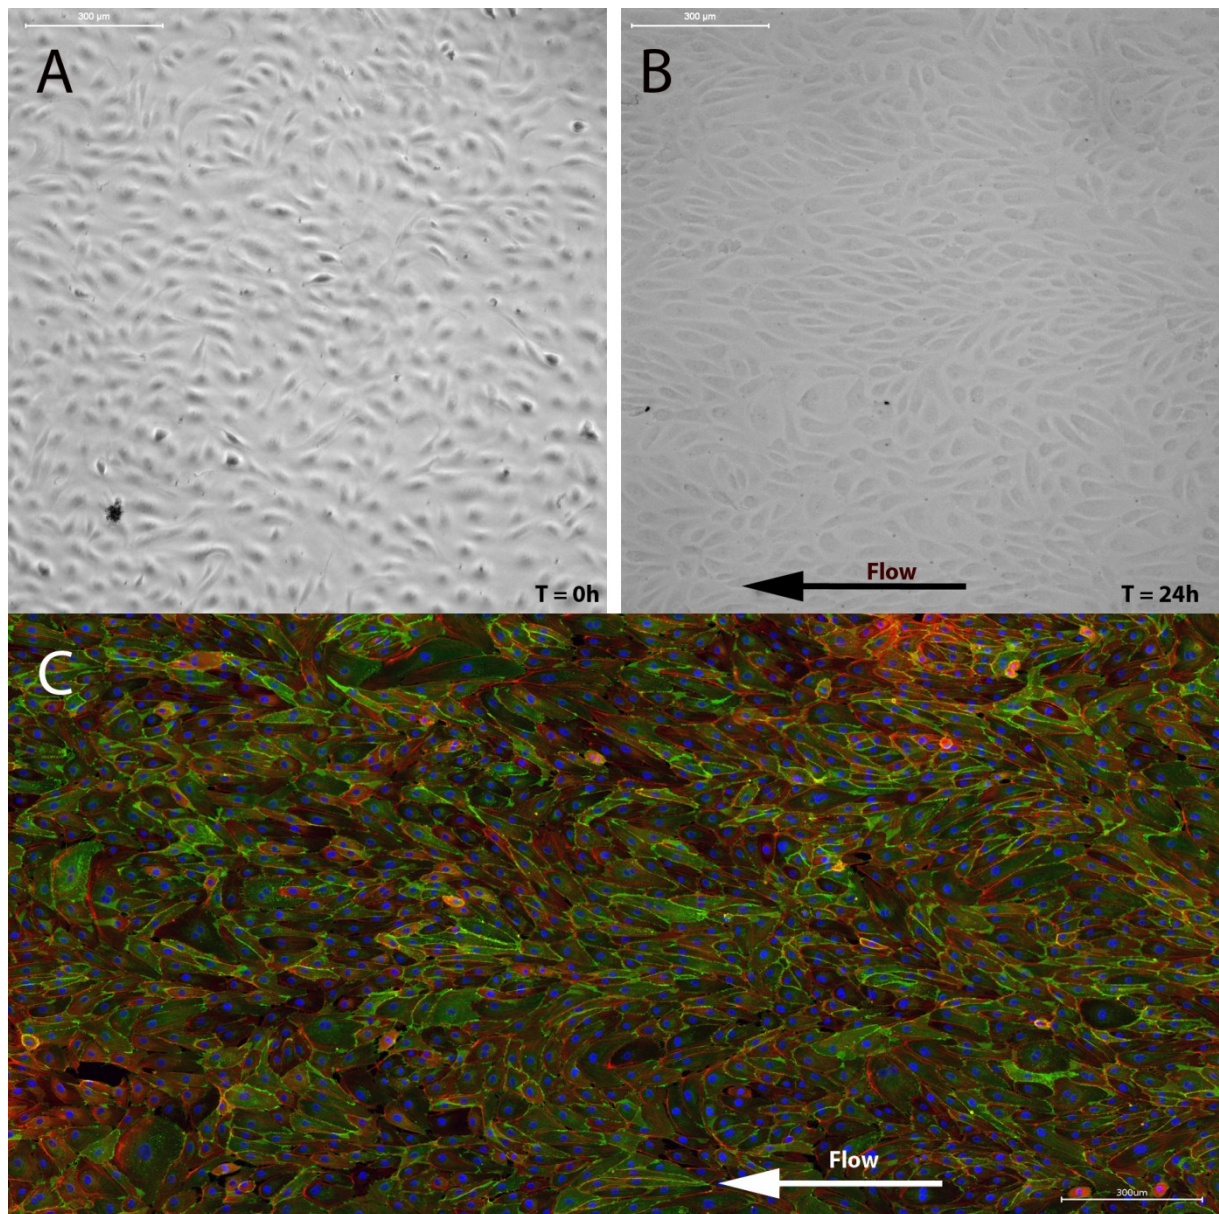

**Supplemental figure 3.** HUVEC cultured under flow conditions.

HUVEC were seeded into fibronectin-coated  $\mu$ -Slide VI 0.1 flow chambers. After 24 hours (A; T=0h) cells were imaged and cultured under flow for an additional 24 hours (B) or 72 hours (C). Cells were fixed and stained with anti-CD31 antibody (green) and actin fibers were stained with phalloidin (red). Nuclei were stained with Hoechst dye (blue). Scale bar: 300  $\mu$ m.
